# Supplementary material for: Antiproliferative Illudalane Sesquiterpenes from the Marine Sediment Ascomycete Aspergillus oryzae
Source: MDPI journal article supplement (doi:10.3390/md19060333), 2021-06-10
Supplement: s1 [file s1]

## SUPPLEMENTARY MATERIAL

### **Antiproliferative Illudalane Sesquiterpenes from the Marine Sediment Ascomycete *Aspergillus oryzae***

Raha Orfali<sup>1</sup>, Shagufta Perveen<sup>1\*</sup>, Muhamamd F. Khan<sup>2</sup>, Atallah F. Ahmed<sup>1</sup>, Areej Al-Taweel<sup>1</sup>, Mohammad A. M. Wadaan<sup>2</sup>, Fahad A. Nasr<sup>3</sup>, Sobia Tabassum<sup>4</sup>, Paolo Luciano<sup>5</sup>, Giuseppina Chianese<sup>5</sup>, Jyh-Horng Sheu<sup>6</sup>, and Orazio Tagliatela-Scafati<sup>5,\*</sup>

<sup>1</sup>Department of Pharmacognosy, College of Pharmacy, King Saud University. P. O. Box 22452, Riyadh 11495, Kingdom of Saudi Arabia, rorfali@ksu.edu.sa, amaltaweel@ksu.edu.sa, alalqahtani@ksu.edu.sa

<sup>2</sup>Bio-products research chair, Department of Zoology, College of Science, King Saud University, P.O. Box 2455, Riyadh 11451, Saudi Arabia, fmuhammad@ksu.edu.sa

<sup>3</sup>Medicinal, Aromatic and Poisonous Plants Research Center, College of Pharmacy, King Saud University, P.O. Box 2455, Riyadh 11451, Saudi Arabia. fnasr@ksu.edu.sa

<sup>4</sup>Interdisciplinary Research Centre in Biomedical Materials (IRCBM), COMSATS University Islamabad, Lahore Campus, Pakistan; sobiatabassum@cuilahore.edu.pk

<sup>5</sup>Department of Pharmacy, School of Medicine and Surgery, University of Naples Federico II, Via Montesano 49, 80131 Naples, Italy; pluciano@unina.it, g.chianese@unina.it

<sup>6</sup>Department of marine biotechnology and resources, National Sun Yat-sen university, kaohsiung 804, Taiwan; sheu@mail.nsysu.edu.tw

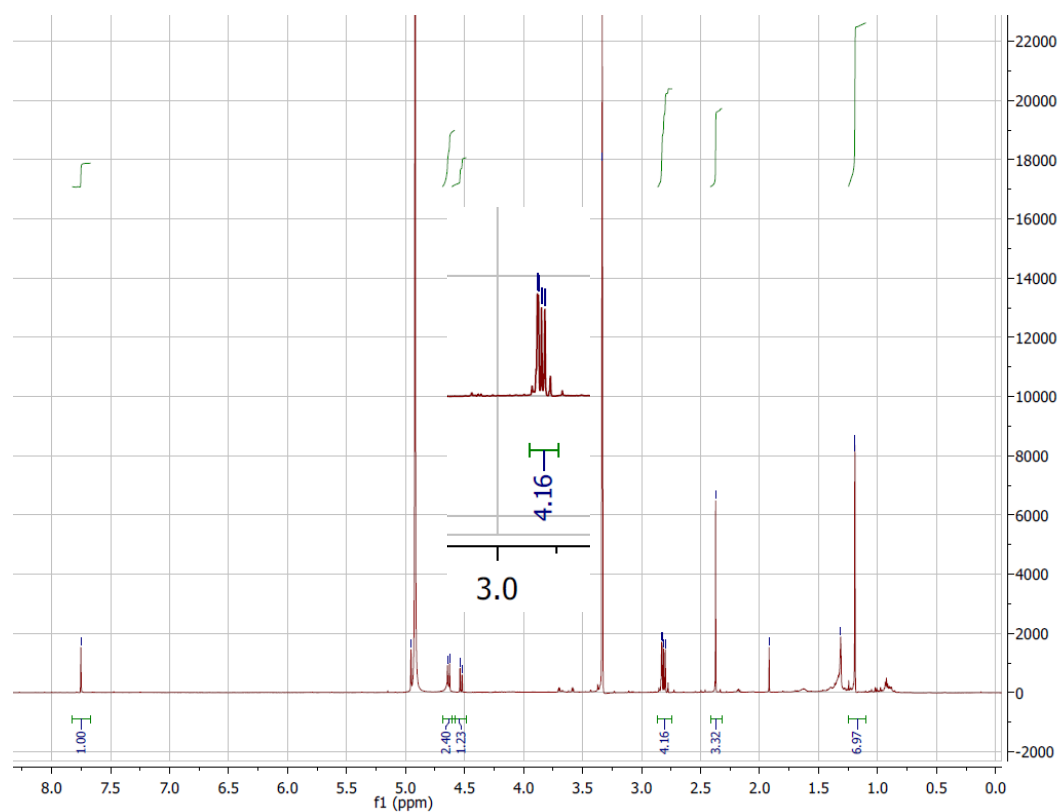

**Figure S1.** <sup>1</sup>H NMR (700 MHz) spectrum of asperorlactone in CD<sub>3</sub>OD

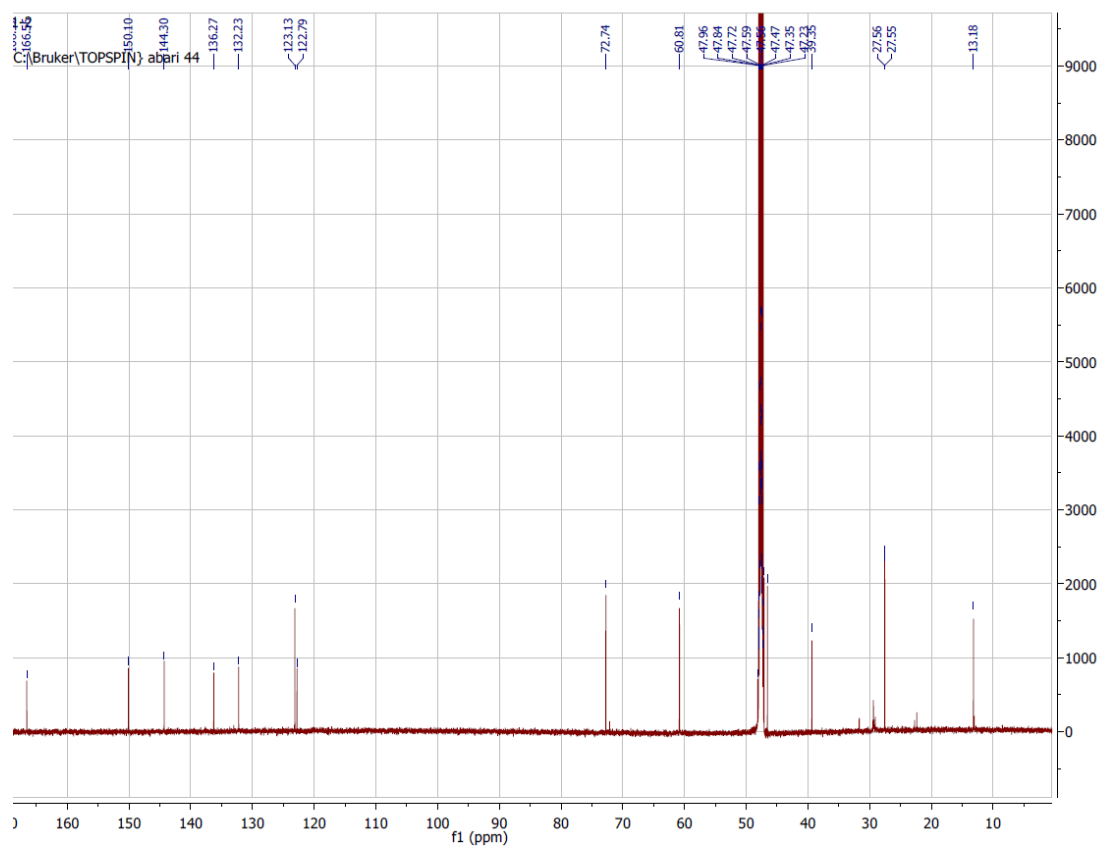

**Figure S2.** <sup>13</sup>C NMR (175 MHz) spectrum of asperorlactone in CD<sub>3</sub>OD

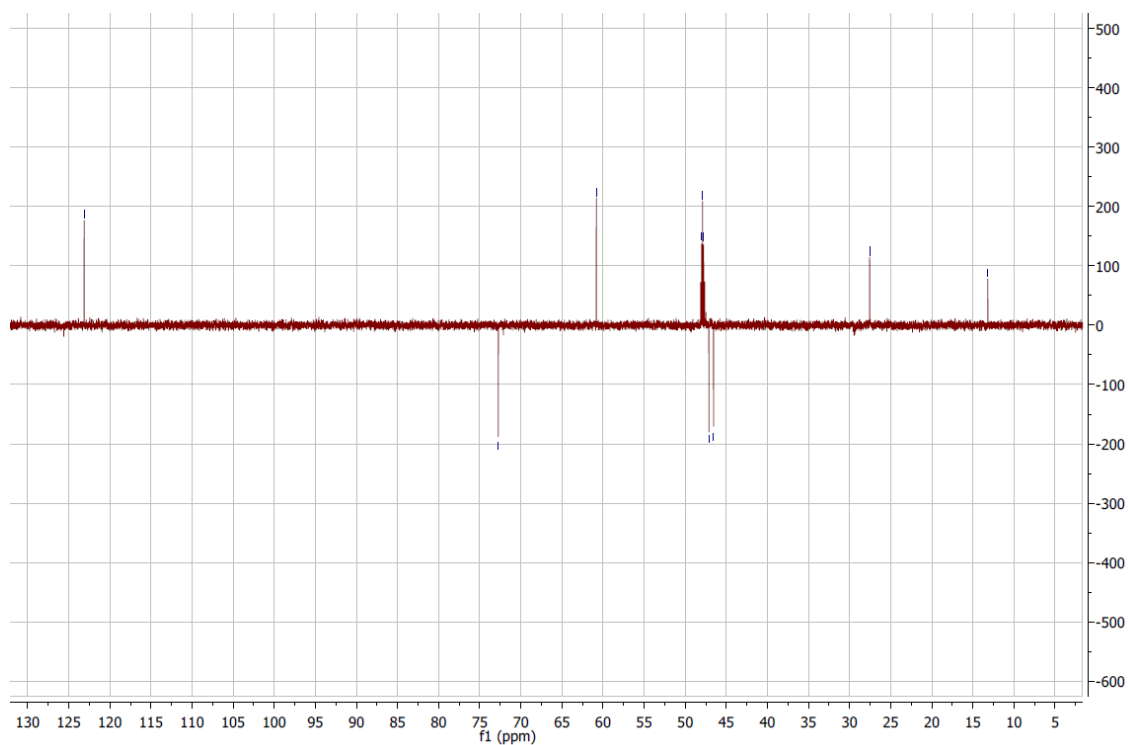

**Figure S3.** DEPT135 NMR (175 MHz) spectrum of asperorlactone in CD<sub>3</sub>OD

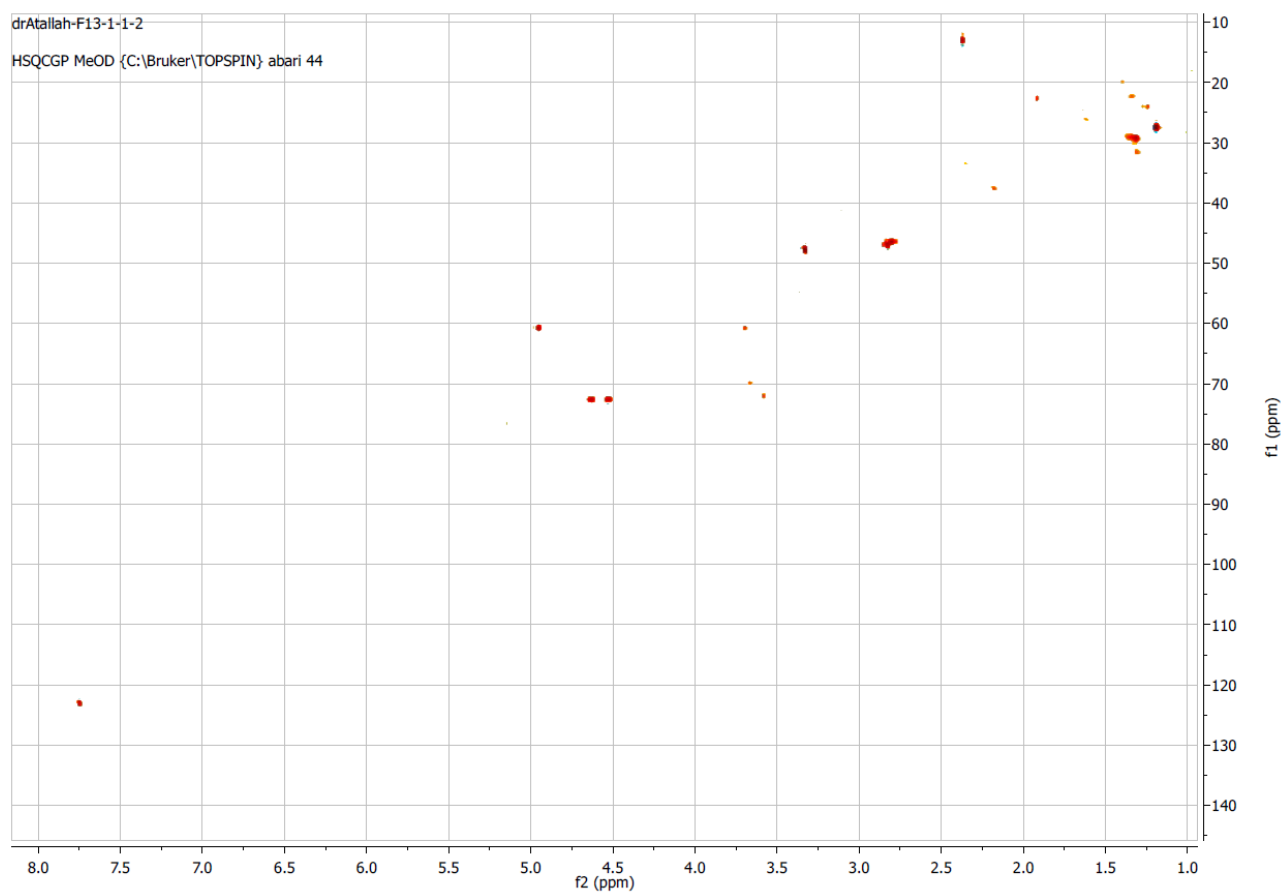

**Figure S4.** 2D NMR HSQC spectrum of asperorlactone in CD<sub>3</sub>OD

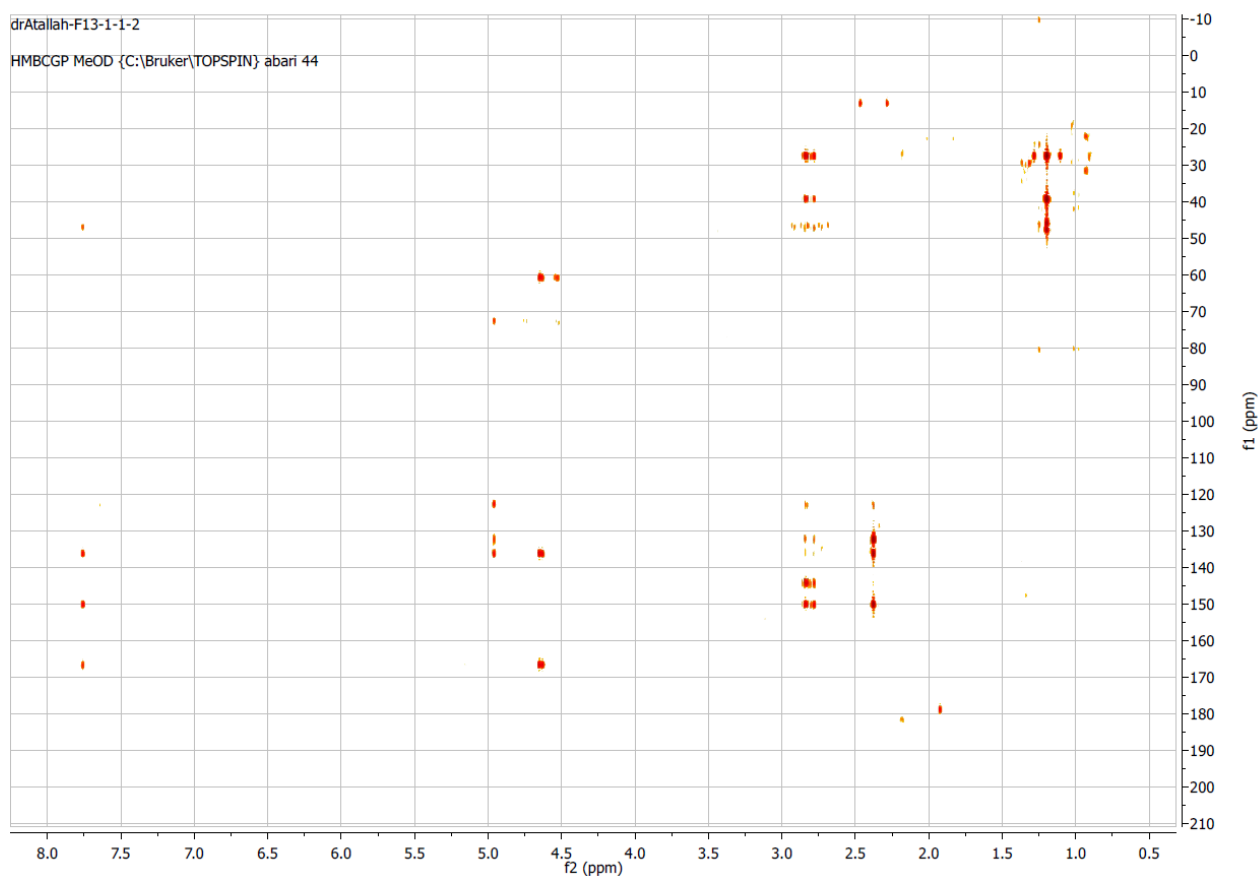

**Figure S5.** 2D NMR HMBC spectrum of asperorlactone in CD<sub>3</sub>OD

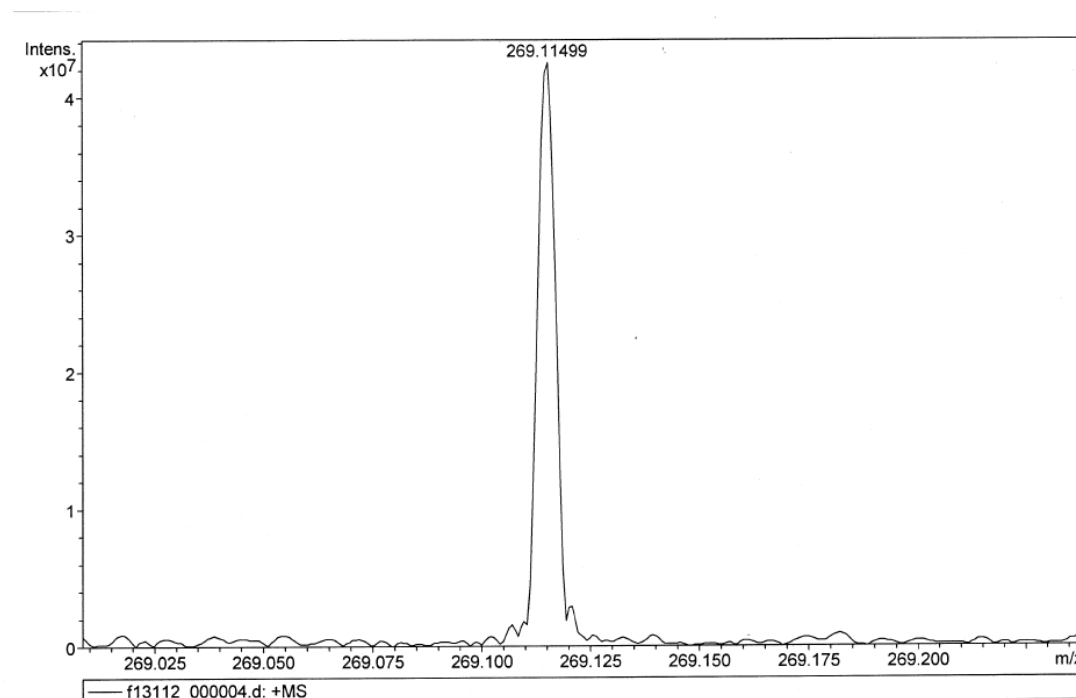

| Meas. m/z | # | Formula                                          | Score  | m/z       | err [mDa] | err [ppm] | mSigma | rdB | e <sup>-</sup> Conf | N-Rule |
|-----------|---|--------------------------------------------------|--------|-----------|-----------|-----------|--------|-----|---------------------|--------|
| 269.11499 | 1 | C <sub>15</sub> H <sub>18</sub> NaO <sub>3</sub> | 100.00 | 269.11482 | -0.17     | -0.65     | 10.7   | 6.5 | even                | ok     |

**Figure S6.** HR-MS spectrum of asperorlactone
